# Supplementary material for: Temperature/water triggered reversible emission transition in a one-dimensional Mn(ii)-based metal halide
Source: Royal Society of Chemistry journal article supplement (doi:10.1039/d4tc03040k), 2024-01-01
Supplement: d4tc03040k1.pdf [file d4tc03040k1.pdf]

# Supporting Information

## Temperature/Water Triggered Reversible Emission Transition in a One-Dimensional Mn(II)-Based Metal Halide

*Yue Wu,<sup>\*a</sup> Xin Zhang,<sup>a</sup> Bo Zhang<sup>a</sup>, Liu-Di Xin<sup>a</sup>, Xiao-Meng Zhen<sup>\*a</sup> and Liang-Jin*

*Xu<sup>\*bc</sup>*

E-mail: [xuliangjin@fjirsm.ac.cn](mailto:xuliangjin@fjirsm.ac.cn); [ywu\\_lcu@163.com](mailto:ywu_lcu@163.com); [1337498078@qq.com](mailto:1337498078@qq.com)

a College of Chemistry and Chemical Engineering, Shandong Provincial Key Laboratory/Collaborative Innovation Center of Chemical Energy Storage and Novel Cell Technology, Liaocheng University, Liaocheng 252059, China

b State Key Laboratory of Structural Chemistry, Fujian Institute of Research on the Structure of Matter, Chinese Academy of Sciences, Fuzhou 350002, China

c Fujian Science & Technology Innovation Laboratory for Optoelectronic Information of China, Fuzhou 350108, China

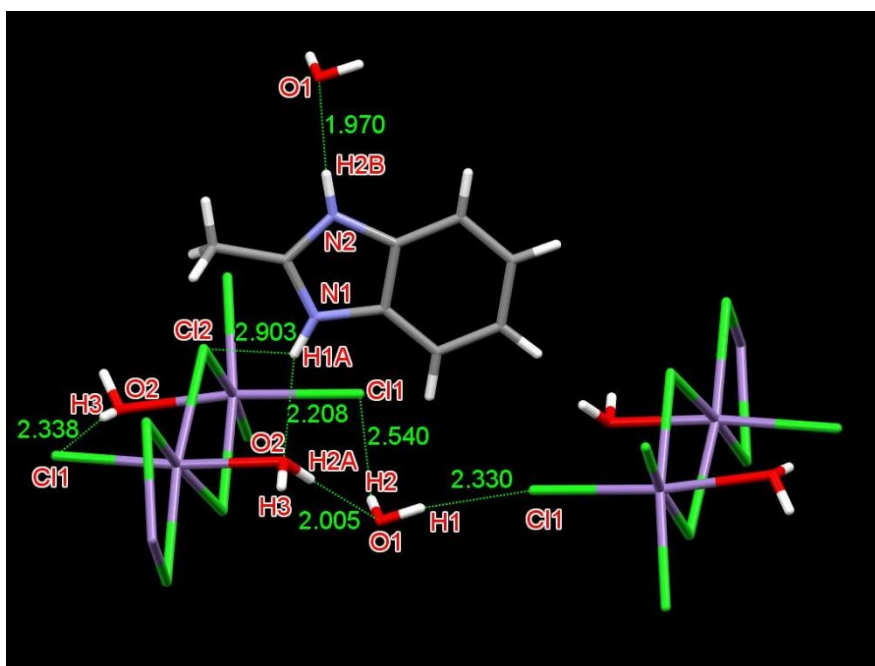

**Figure S1.** The view of 1D structural diagram of compound **1**, illustrating intermolecular hydrogen bonding such as O-H $\cdots$ O, O-H $\cdots$ Cl, N-H $\cdots$ O and N-H $\cdots$ Cl with short bond lengths.

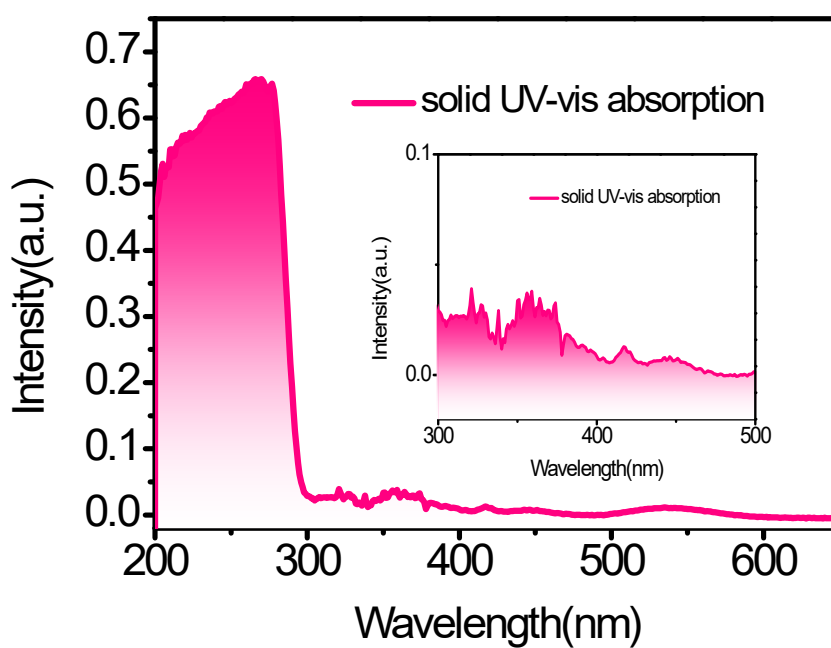

**Figure S2.** The solid UV-vis absorption spectrum of compound **1**. (Inset: the enlarged region of 300-500 nm)

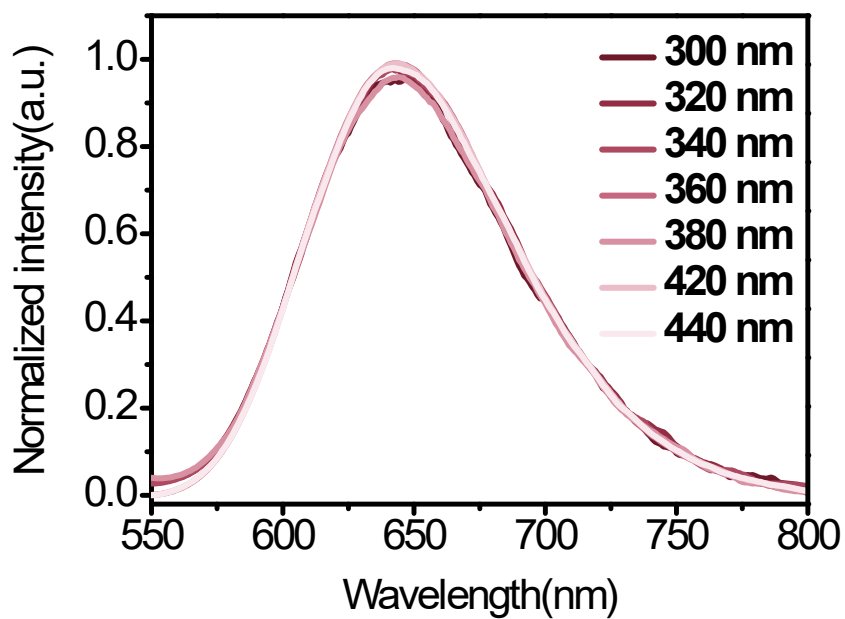

Figure S3. The excitation-dependent PL spectrum of compound 1.

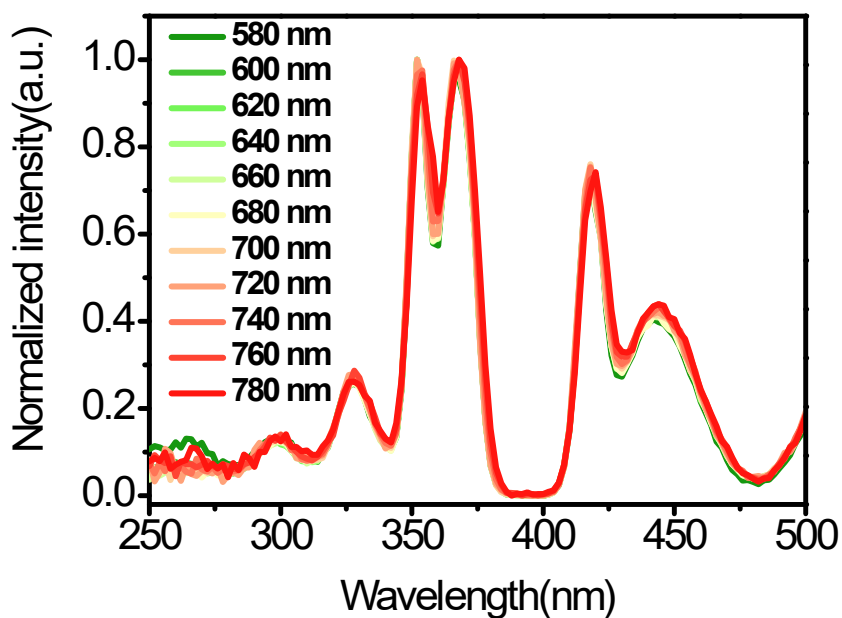

Figure S4. The emission-dependent PLE spectrum of compound 1.

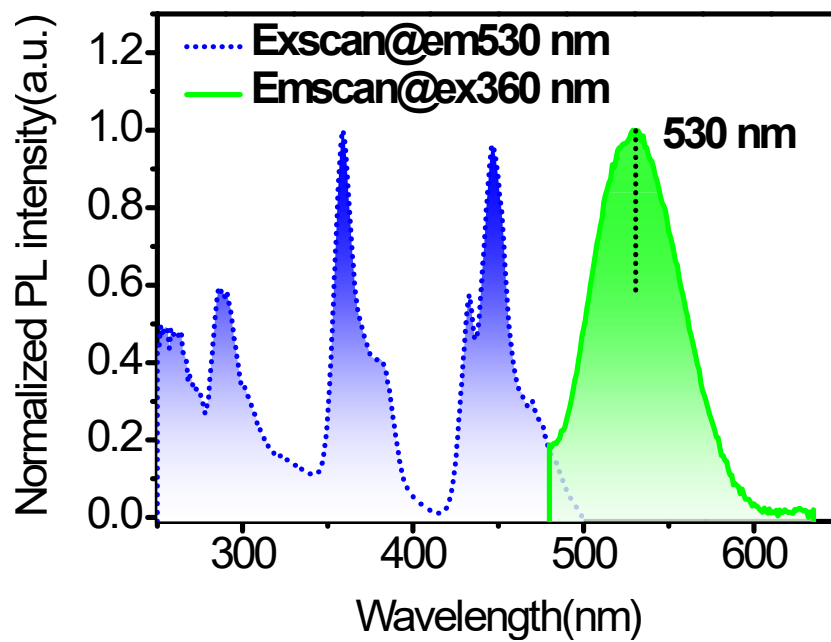

**Figure S5.** The PLE and PL spectrum of the yellow-emitting sample from compound **1** with water release.

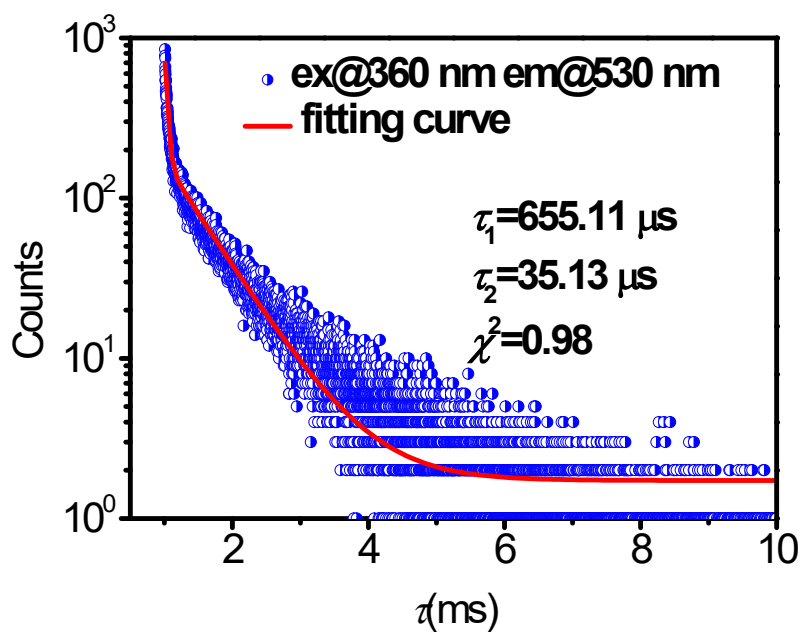

(a)

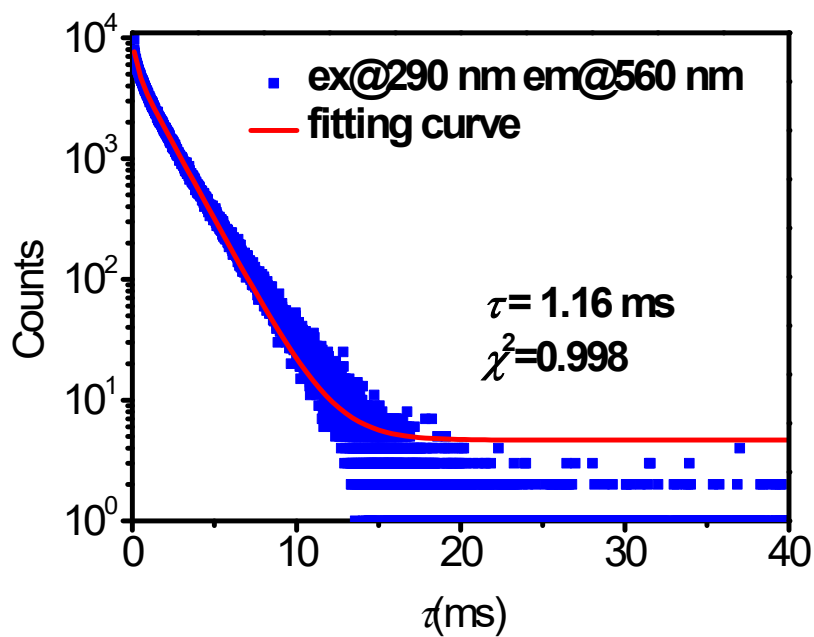

(b)

**Figure S6.** The emission decay time curves of yellow-emitting **sample** from compound **1** monitored at (a) 530 nm excited by 360 nm and (b) 560 nm excited by 290 nm at room temperature.

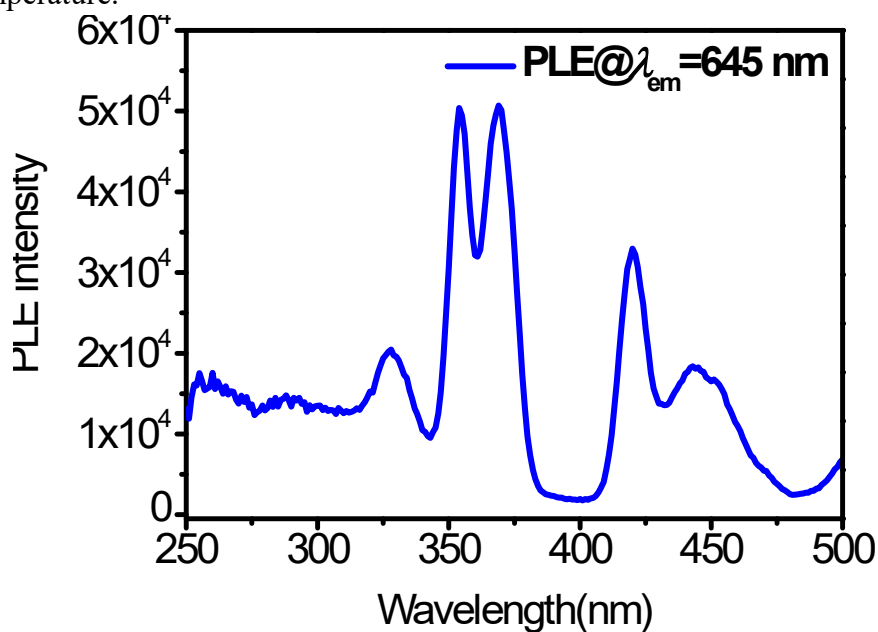

**Figure S7.** The PLE **spectrum** of yellow-emitting **sample** with water absorption.

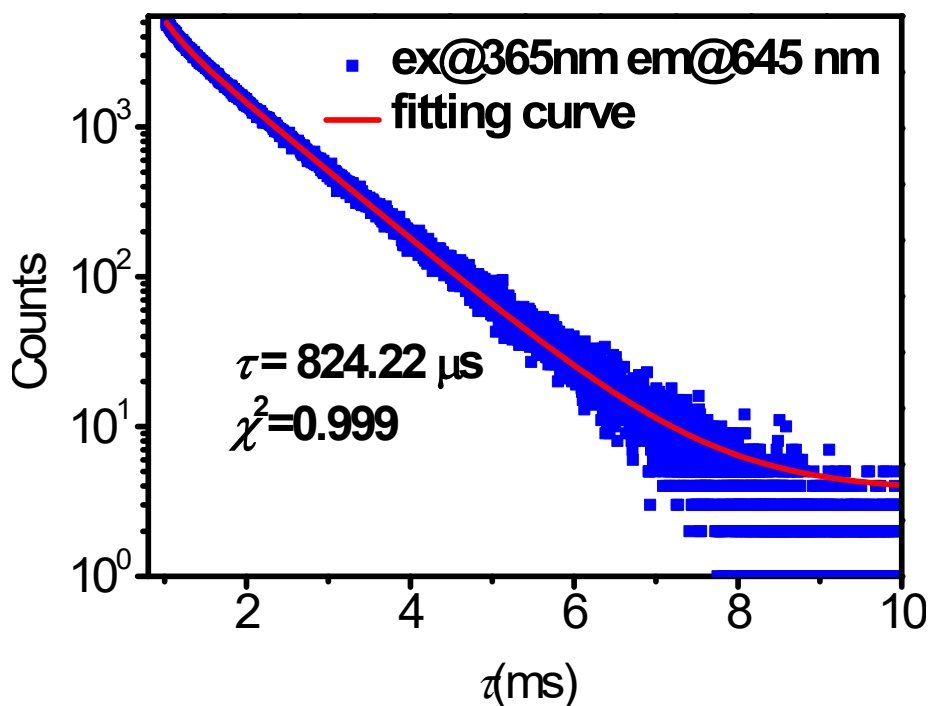

**Figure S8.** The emission decay time curves of yellow-emitting **sample** with water absorption monitored at 645 nm when excited at 365 nm at room temperature.

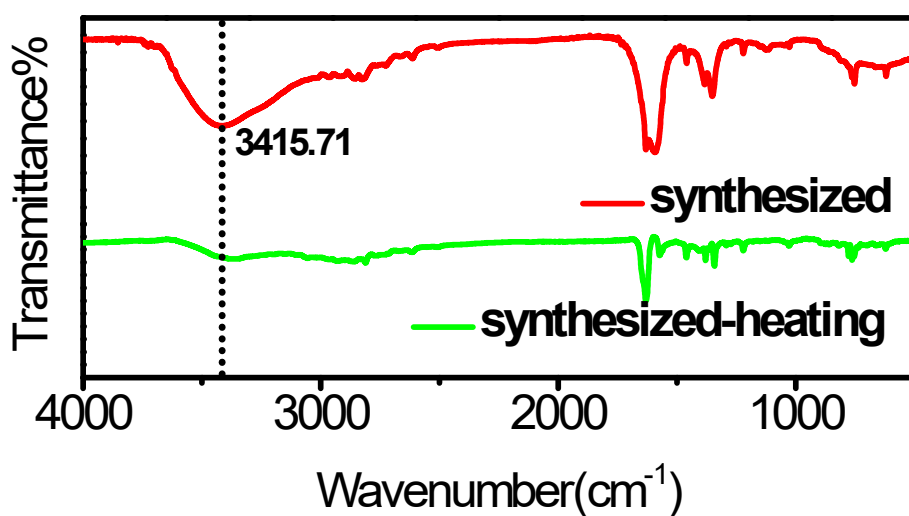

**Figure S9.** The Fourier transform infrared spectrum of compound **1** and yellow-emitting **sample** from compound **1** with a heating treatment.

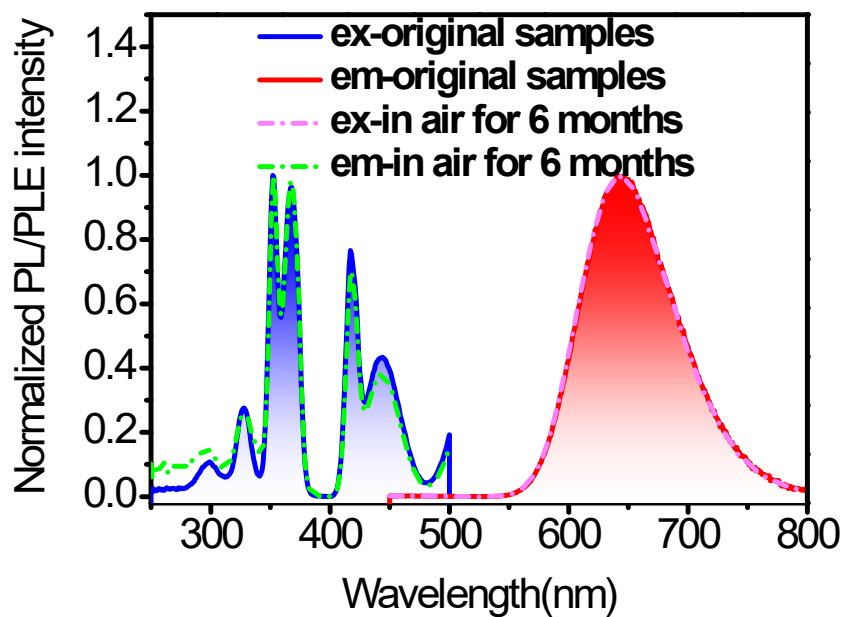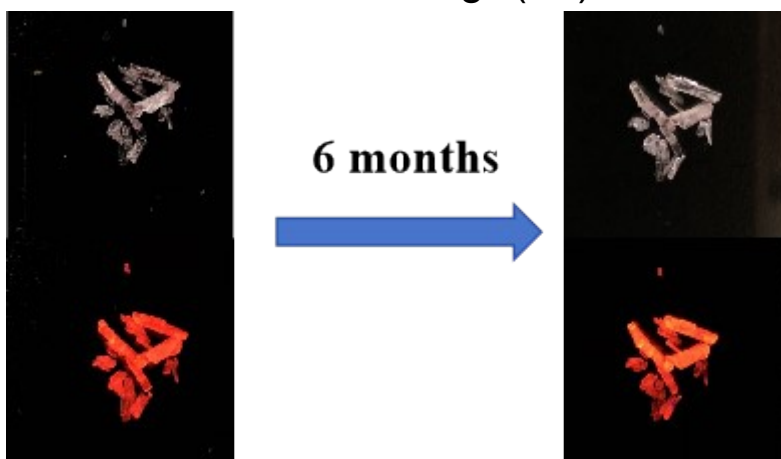

**Figure S10.** (a) The PL and PLE spectrum and (b) corresponding photographs of the original compound **1** and sample exposed to air conditions for 6 months.

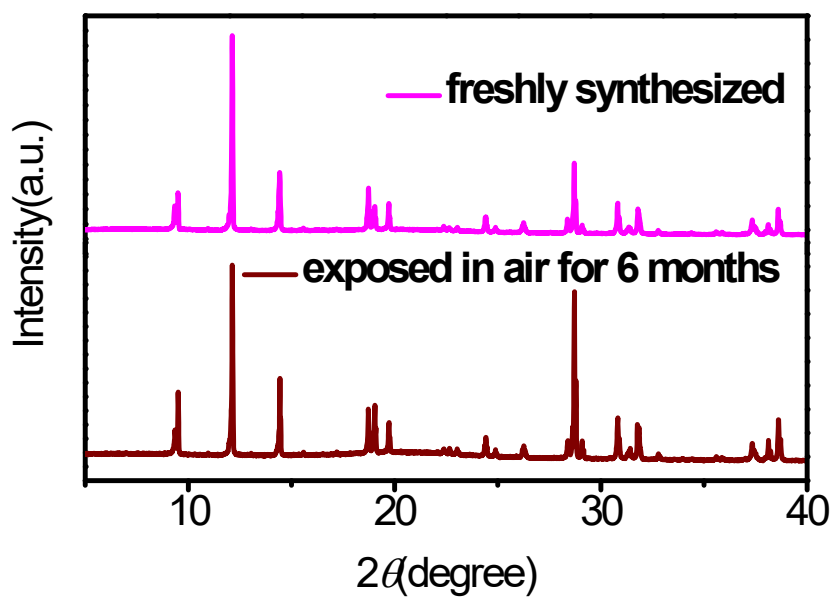

**Figure S11.** The PXRD patterns of compound **1** and corresponding **sample** exposed to air conditions for 6 months.

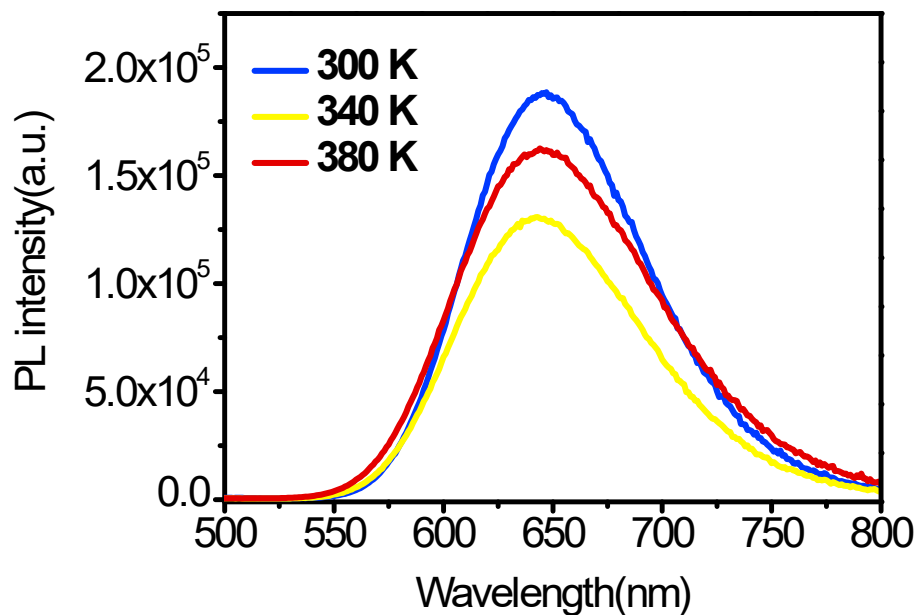

**Figure S12.** The PL **spectrum** of the original compound **1** under different heating treatments at various temperatures.



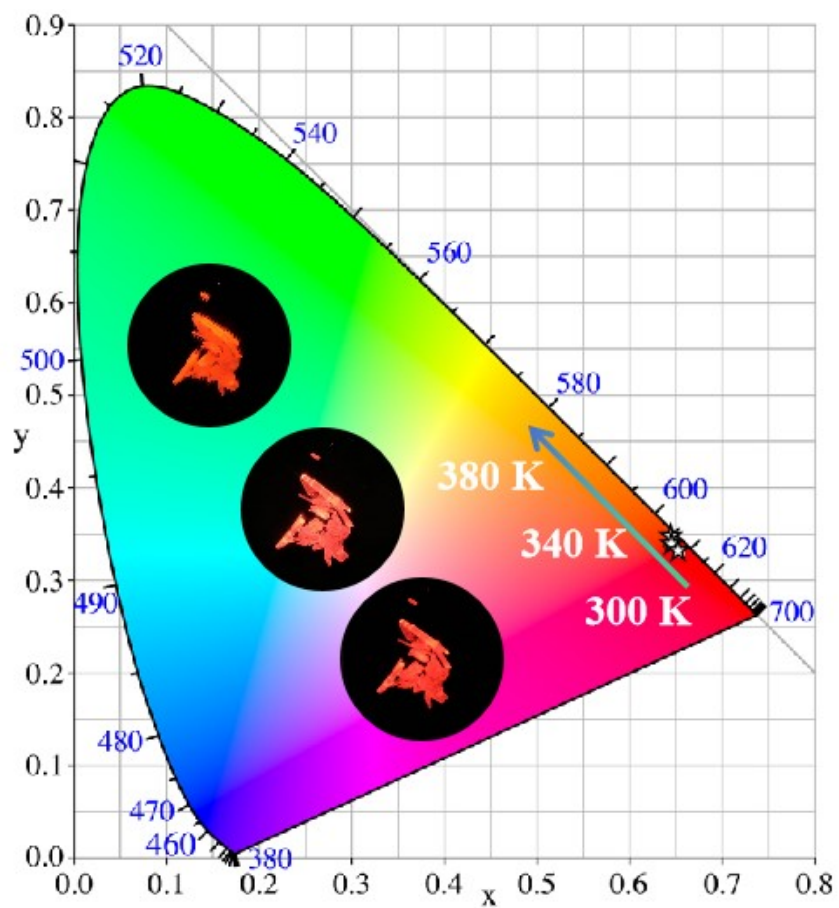

**Figure S13.** The CIE diagram of compound **1** at different temperatures (inset: photographs of compound **1** crystals).

**Table S1.** Single X-ray Diffraction Crystallographic Data of compound **1**.

| <b>Compounds</b>                                   | <b>(C<sub>8</sub>H<sub>9</sub>N<sub>2</sub>)<sub>n</sub>{(MnCl<sub>3</sub>(H<sub>2</sub>O)·H<sub>2</sub>O)}<sub>n</sub></b> |
|----------------------------------------------------|-----------------------------------------------------------------------------------------------------------------------------|
| <b>Moiety formula</b>                              | C <sub>8</sub> H <sub>13</sub> O <sub>2</sub> N <sub>2</sub> Mn <sub>2</sub> Cl <sub>3</sub>                                |
| <b>chemical_formula_moiety</b>                     | (C <sub>8</sub> H <sub>9</sub> N <sub>2</sub> )MnCl <sub>3</sub> (H <sub>2</sub> O)·H <sub>2</sub> O                        |
| <b>Formula weight / g.mol<sup>-1</sup></b>         | 330.49                                                                                                                      |
| <b>Temperature / K</b>                             | 298                                                                                                                         |
| <b>Crystal system</b>                              | Monoclinic                                                                                                                  |
| <b>Space group</b>                                 | <i>P</i> 2 <sub>1</sub> / <i>c</i>                                                                                          |
| <b><i>a</i> / Å</b>                                | 9.6164(9)                                                                                                                   |
| <b><i>b</i> / Å</b>                                | 7.2631(7)                                                                                                                   |
| <b><i>c</i> / Å</b>                                | 18.8935(16)                                                                                                                 |
| <b><i>α</i> / deg</b>                              | 90                                                                                                                          |
| <b><i>β</i> / deg</b>                              | 99.858(2)                                                                                                                   |
| <b><i>γ</i> / deg</b>                              | 90                                                                                                                          |
| <b>volume / Å<sup>3</sup></b>                      | 1300.1(2)                                                                                                                   |
| <b><i>Z</i></b>                                    | 4                                                                                                                           |
| <b><i>ρ</i><sub>calc</sub> / g.cm<sup>-3</sup></b> | 1.688                                                                                                                       |
| <b><i>F</i>(000)</b>                               | 668.0                                                                                                                       |
| <b>Crystal size / mm<sup>3</sup></b>               | 0.10 × 0.12 × 0.42                                                                                                          |
| <b><i>μ</i> / mm<sup>-1</sup></b>                  | 1.618                                                                                                                       |
| <b>Data completeness</b>                           | 0.997                                                                                                                       |
| <b>Radiation</b>                                   | Mo Kα ( <i>λ</i> = 0.71073 Å)                                                                                               |
| <b>Final <i>R</i> indexes [all data]</b>           | <i>R</i> <sub>1</sub> <sup>a</sup> =0.0483 <i>wR</i> <sub>2</sub> <sup>b</sup> =0.1205                                      |
| <b>GOF</b>                                         | 1.016                                                                                                                       |
| <b>CCDC number</b>                                 | 2360551                                                                                                                     |

$$(a) R_1 = \frac{\sum |F_o - F_c|}{\sum F_o}$$

$$(b) wR_2 = \frac{\sum [w(F_o^2 - F_c^2)^2]}{\sum [w(F_o^2)^2]}$$

**TableS2.** Selected bond angle (°) of compound **1**.

|           | <b>Bond</b>                                          | <b>Bond angle(°)</b> |
|-----------|------------------------------------------------------|----------------------|
| <b>1</b>  | Cl1-Mn1-Cl2                                          | 91.31(4)             |
| <b>2</b>  | Cl1-Mn1-Cl3                                          | 95.40(4)             |
| <b>3</b>  | Cl1-Mn1-Cl2 <sup>a</sup>                             | 95.71(4)             |
| <b>4</b>  | Cl1-Mn1-Cl3 <sup>a</sup>                             | 91.85(4)             |
| <b>5</b>  | Cl2 <sup>a</sup> -Mn1-Cl3                            | 90.36(4)             |
| <b>6</b>  | Cl3 <sup>a</sup> -Mn1-Cl2 <sup>a</sup>               | 87.49(4)             |
| <b>7</b>  | Cl3 <sup>a</sup> -Mn1 <sup>b</sup> -Cl2 <sup>a</sup> | 86.96(4)             |
| <b>8</b>  | Cl2-Mn1-Cl3 <sup>a</sup>                             | 94.31(4)             |
| <b>9</b>  | O2-Mn1-Cl2 <sup>a</sup>                              | 87.92(8)             |
| <b>10</b> | O2-Mn1-Cl3 <sup>a</sup>                              | 82.28(8)             |
| <b>11</b> | O2-Mn1-Cl2                                           | 85.32(8)             |
| <b>12</b> | O2-Mn1-Cl3                                           | 90.58(8)             |
| <b>13</b> | Mn1-Cl2 <sup>a</sup> -Mn1 <sup>b</sup>               | 92.51(4)             |
| <b>14</b> | Mn1-Cl3 <sup>a</sup> -Mn1 <sup>b</sup>               | 92.08(4)             |

Symmetry code: (a)  $-x+1, y-1/2, -z+1/2$ ; (b)  $-x+1, y+1/2, -z+1/2$ .

**TableS3.** Selected bond length (Å) of compound **1**.

|          | <b>Bond</b>                   | <b>Bond length(Å)</b> |
|----------|-------------------------------|-----------------------|
| <b>1</b> | Mn1-O2                        | 2.294(3)              |
| <b>2</b> | Mn1-Cl1                       | 2.542(1)              |
| <b>3</b> | Mn1-Cl2                       | 2.532(1)              |
| <b>4</b> | Mn1-Cl3                       | 2.536(1)              |
| <b>5</b> | Mn1-Cl2 <sup>a</sup>          | 2.514(1)              |
| <b>6</b> | Mn1-Cl3 <sup>a</sup>          | 2.528(1)              |
| <b>7</b> | Mn1 $\cdots$ Mn1 <sup>b</sup> | 3.6454(9)             |

Symmetry code: (a)  $-x+1, y-1/2, -z+1/2$ ; (b)  $-x+1, y+1/2, -z+1/2$ .

**TableS4.** List of hydrogen bonds in compound **1**.

| D-H...A                              | d(D-H) (Å) | d(H...A) (Å) | d(D...A) (Å) | <(DHA) (°) |
|--------------------------------------|------------|--------------|--------------|------------|
| <b>O1-H1...Cl1<sup>a</sup></b>       | 0.82(6)    | 2.35(6)      | 3.164(4)     | 172(5)     |
| <b>O1-H2...Cl1<sup>b</sup></b>       | 0.75(5)    | 2.55(5)      | 3.254(4)     | 157(5)     |
| <b>O2-H2A...O1<sup>c</sup></b>       | 0.82       | 2.01         | 2.823(4)     | 175.1      |
| <b>O2-H3...Cl1<sup>d</sup></b>       | 0.82(6)    | 2.36(6)      | 3.178(3)     | 171(6)     |
| <b>N1-<br/>H1A...Cl2<sup>e</sup></b> | 0.86       | 2.90         | 3.385(4)     | 117.4      |
| <b>N1-H1A...O2<sup>f</sup></b>       | 0.86       | 2.21         | 3.016(4)     | 156.7      |
| <b>N2-H2B...O1<sup>g</sup></b>       | 0.86       | 1.97         | 2.820(4)     | 171.0      |

Symmetry code: (a)  $-x+1, -y+1, -z$ ; (b)  $x, y-1, z$ ; (c)  $-x+1, y+1/2, -z+1/2$ ; (d)  $-x+1, y+1/2, -z+1/2$ ; (e)  $x, y-1, z$ ; (f)  $-x+1, y-1/2, -z+1/2$ ; (g)  $x-1, y, z$ .
